# Supplementary material
Source: bioRxiv or medRxiv preprint supplement (https://medrxiv.org/highwire/filestream/93718/field_highwire_adjunct_files/0/2020.08.16.20169979-1.pdf)
Supplement: Supplementary file [file 2020.08.16.20169979-1.pdf]

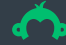

SIGN UP FREE

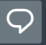

# Survey Results

Q1

What is your age?

Answered: 52 Skipped: 0

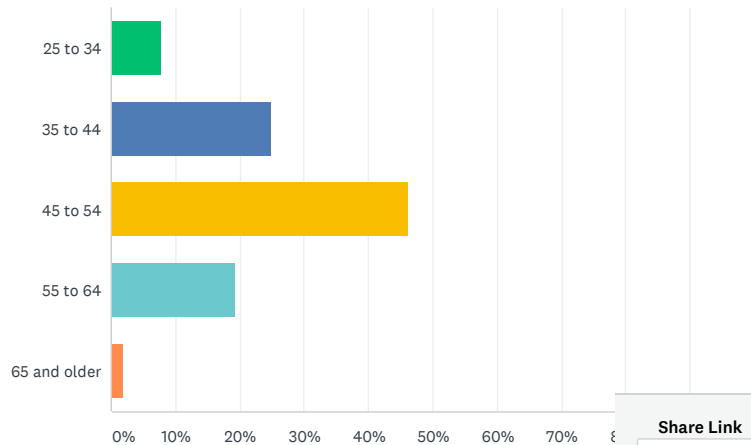

Share Link

<https://www.surveymonkey.com/re:>

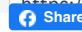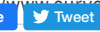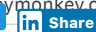

COPY

52 responses

| ANSWER CHOICES | RESPONSES |
|----------------|-----------|
| 25 to 34       | 7.69% 4   |
| 35 to 44       | 25.00% 13 |
| 45 to 54       | 46.15% 24 |
| 55 to 64       | 19.23% 10 |
| 65 and older   | 1.92% 1   |
| <b>TOTAL</b>   | <b>52</b> |

Q2

What is your gender?

Answered: 51 Skipped: 1

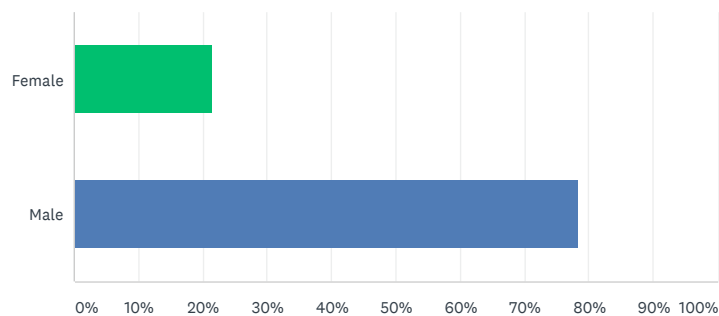

| ANSWER CHOICES | RESPONSES |           |
|----------------|-----------|-----------|
| Female         | 21.57%    | 11        |
| Male           | 78.43%    | 40        |
| <b>TOTAL</b>   |           | <b>51</b> |

Q3

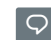

### Your institution/workplace

Answered: 52 Skipped: 0

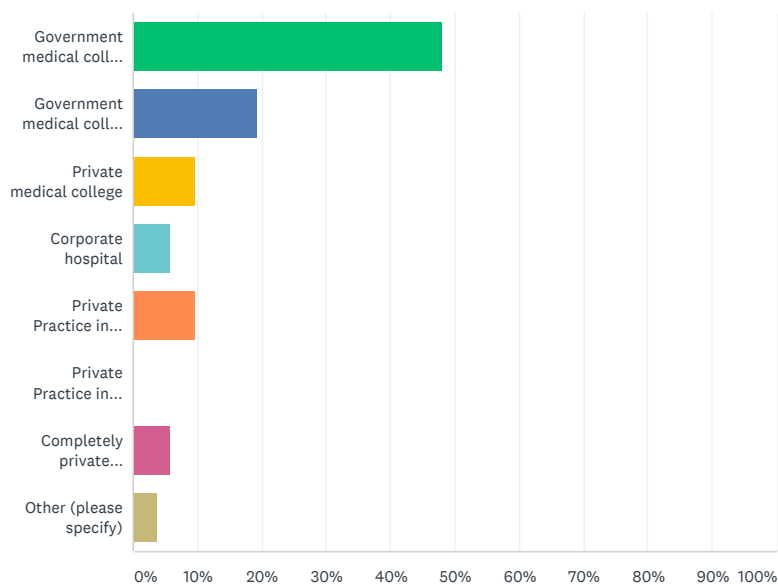

| ANSWER CHOICES                                     | RESPONSES |    |
|----------------------------------------------------|-----------|----|
| Government medical college hospital (old)          | 48.08%    | 25 |
| Government medical college hospital (new)          | 19.23%    | 10 |
| Private medical college                            | 9.62%     | 5  |
| Corporate hospital                                 | 5.77%     | 3  |
| Private Practice in divisional headquarters        | 9.62%     | 5  |
| Private Practice in district levels and peripheral | 0.00%     | 0  |
| Completely private practice                        | 5.77%     | 3  |
| Other (please specify)                             | 3.85%     | 2  |
| <b>Total Respondents: 52</b>                       |           |    |

Q4

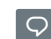

### How many routine operations did you/team had done between April 1 and June 30 2020

Answered: 52 Skipped: 0

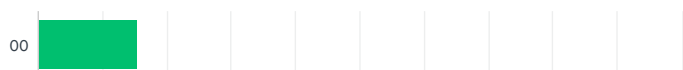

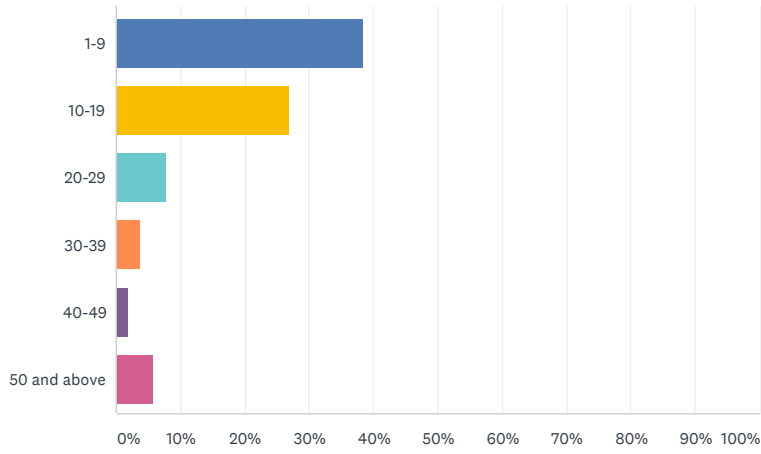

| ANSWER CHOICES | RESPONSES |           |
|----------------|-----------|-----------|
| 00             | 15.38%    | 8         |
| 1-9            | 38.46%    | 20        |
| 10-19          | 26.92%    | 14        |
| 20-29          | 7.69%     | 4         |
| 30-39          | 3.85%     | 2         |
| 40-49          | 1.92%     | 1         |
| 50 and above   | 5.77%     | 3         |
| <b>TOTAL</b>   |           | <b>52</b> |

Q5

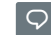

How many emergency operations did you/team had done between 1 April and 30 June 2020

Answered: 52 Skipped: 0

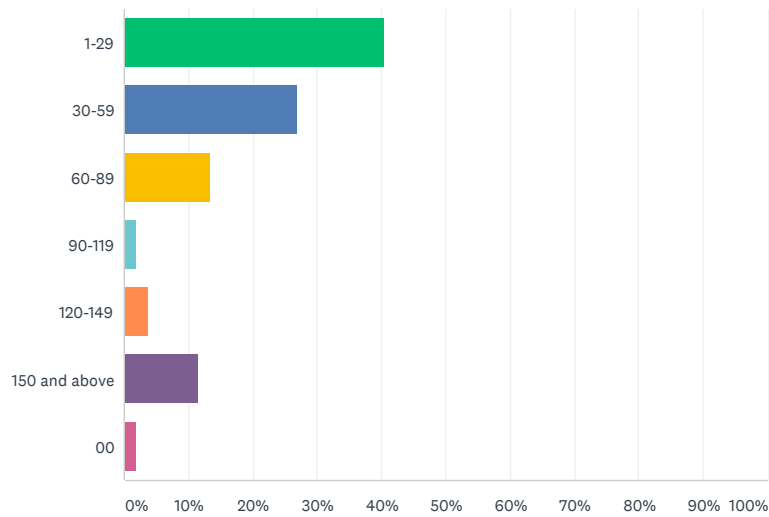

| ANSWER CHOICES | RESPONSES |    |
|----------------|-----------|----|
| 1-29           | 40.38%    | 21 |

| ANSWER CHOICES | RESPONSES | COUNT     |
|----------------|-----------|-----------|
| 30-59          | 26.92%    | 14        |
| 60-89          | 13.46%    | 7         |
| 90-119         | 1.92%     | 1         |
| 120-149        | 3.85%     | 2         |
| 150 and above  | 11.54%    | 6         |
| 00             | 1.92%     | 1         |
| <b>TOTAL</b>   |           | <b>52</b> |

Q6

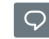

How many laparoscopy have you/team done between April 1 and June 30

Answered: 52 Skipped: 0

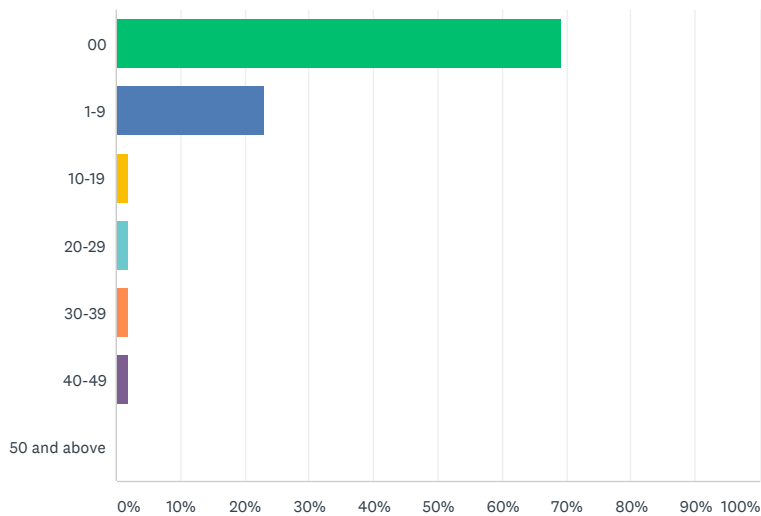

| ANSWER CHOICES | RESPONSES | COUNT     |
|----------------|-----------|-----------|
| 00             | 69.23%    | 36        |
| 1-9            | 23.08%    | 12        |
| 10-19          | 1.92%     | 1         |
| 20-29          | 1.92%     | 1         |
| 30-39          | 1.92%     | 1         |
| 40-49          | 1.92%     | 1         |
| 50 and above   | 0.00%     | 0         |
| <b>TOTAL</b>   |           | <b>52</b> |

Q7

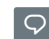

How many suspected covid patients have you/team operated during this period

Answered: 52 Skipped: 0

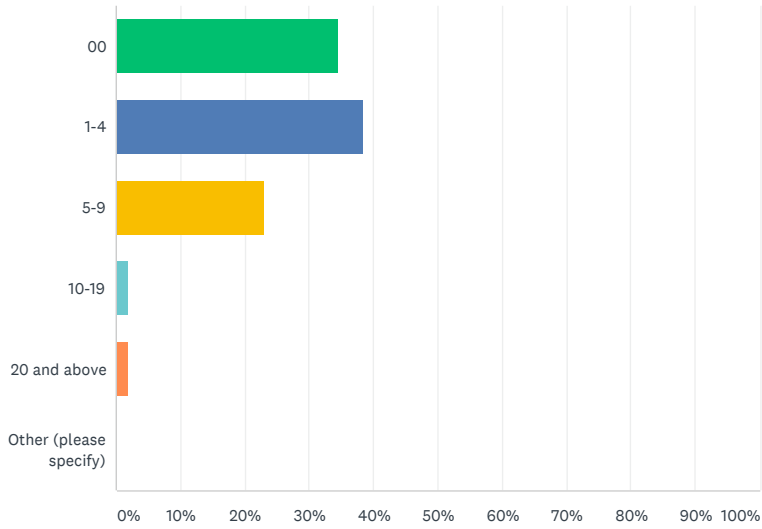

| ANSWER CHOICES         | RESPONSES |           |
|------------------------|-----------|-----------|
| 00                     | 34.62%    | 18        |
| 1-4                    | 38.46%    | 20        |
| 5-9                    | 23.08%    | 12        |
| 10-19                  | 1.92%     | 1         |
| 20 and above           | 1.92%     | 1         |
| Other (please specify) | 0.00%     | 0         |
| <b>TOTAL</b>           |           | <b>52</b> |

Q8

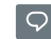

How many of you/team become covid positive during this period

Answered: 52 Skipped: 0

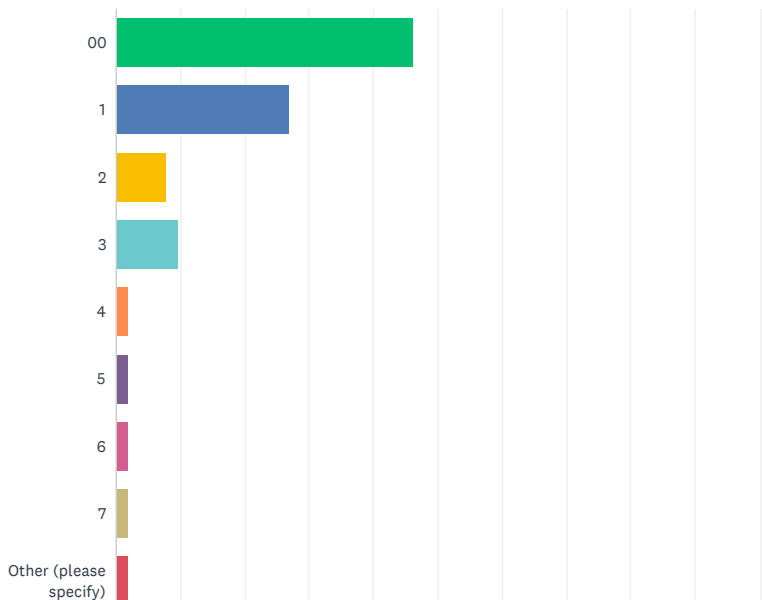

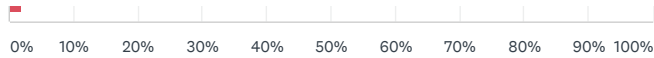

| ANSWER CHOICES         | RESPONSES |           |
|------------------------|-----------|-----------|
| 00                     | 46.15%    | 24        |
| 1                      | 26.92%    | 14        |
| 2                      | 7.69%     | 4         |
| 3                      | 9.62%     | 5         |
| 4                      | 1.92%     | 1         |
| 5                      | 1.92%     | 1         |
| 6                      | 1.92%     | 1         |
| 7                      | 1.92%     | 1         |
| Other (please specify) | 1.92%     | 1         |
| <b>TOTAL</b>           |           | <b>52</b> |

Q9

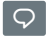

How much percentage of your/teams volume of operations have been reduced than pre-covid average

Answered: 52 Skipped: 0

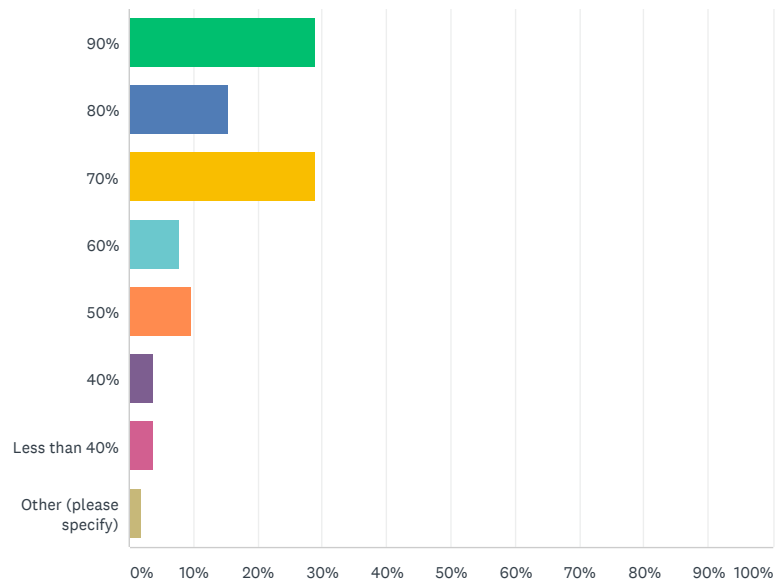

| ANSWER CHOICES | RESPONSES |    |
|----------------|-----------|----|
| 90%            | 28.85%    | 15 |
| 80%            | 15.38%    | 8  |
| 70%            | 28.85%    | 15 |
| 60%            | 7.69%     | 4  |
| 50%            | 9.62%     | 5  |
| 40%            | 3.85%     | 2  |
| Less than 40%  | 3.85%     | 2  |

|                        |       |           |
|------------------------|-------|-----------|
| Other (please specify) | 1.92% | 1         |
| <b>TOTAL</b>           |       | <b>52</b> |

Q10

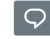

Are you mentally prepared to start full swing routine operations given the current situation

Answered: 52 Skipped: 0

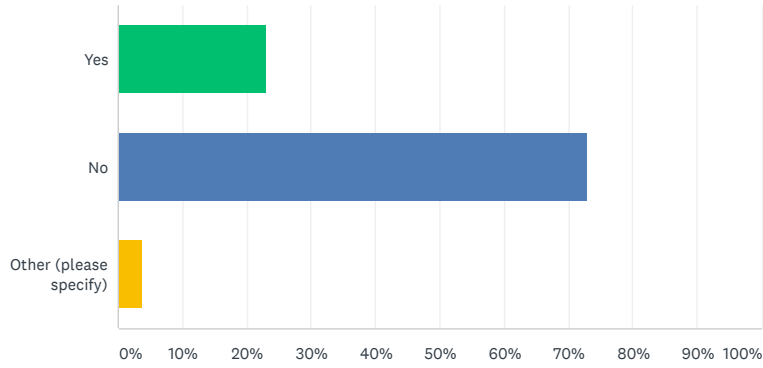

| ANSWER CHOICES         | RESPONSES |           |
|------------------------|-----------|-----------|
| Yes                    | 23.08%    | 12        |
| No                     | 73.08%    | 38        |
| Other (please specify) | 3.85%     | 2         |
| <b>TOTAL</b>           |           | <b>52</b> |

Powered by SurveyMonkey

Check out our [sample surveys](#) and [create your own now!](#)
